# Supplementary material
Source: Research Square preprint supplement (doi:10.21203/rs.3.rs-8968752/v1)
Supplement: Supplementary file 1 [file 156722b9c0f444197610ce0e.docx]

| First author, year | Sample size | Health status | Mean age (years±SD) | Mean BMI (kg/m2±SD) | Design | Exercise Mode | Exercise protocol | Control protocol | Intervention duration | Session per week | Outcomes |
| --- | --- | --- | --- | --- | --- | --- | --- | --- | --- | --- | --- |
| Abdollahpour et al, 2017 [33] | 27 | Breast Cancer | EX:58.8±6.4  CON:55.3±5.2 | EX:28.2±3.4  CON:29.9±2.3 | RCT | Aerobic | 15-50 min at 45-80% of HRmax | Maintained their usual physical activity | 6 months | 3 | IL-6, TNF-α |
| Alizadeh et al, 2019 [44] | 48 | Breast Cancer | EX:49.2±9.7  CON:48.4±7.5 | EX:27.8±4.0  CON:28.0±3.9 | RCT | HIIT | 38 min HIIT consisted of 4×4-min uphill walking intervals at 90–95% of predicted HRmax, interspersed with 4×3-min active recovery periods at 50–70% HRmax | Usual care | 12 weeks | 3 | IL-6, IL-1β, IL10 |
| Bower et al, 2014 [52] | 29 | Breast Cancer Survivors | 54.0±5.4 | ND | RCT | Iyengar Yoga | 90 min, intervention focused on passive inversions (e.g., supported head-below-heart postures) and passive backbends (e.g., supported spinal extensions), designed to reduce fatigue. Sessions involved postures and breathing | Health education sessions delivered as an attention-control condition, not involving physical activity | 12  weeks | 2 | IL-6, IL-1ra, CRP |
| Daryanoosh et al, 2025 [51] | 19 | Breast Cancer | EX:41.0±5.0  CON:46.0±6.0 | EX:28.4±3.5  CON:28.6±3.3 | RCT | Aerobic | 50-65 min at 50-65% HRmax | Usual care | 8  weeks | 3 | CRP |
| De Paulo et al, 2018 [40] | 36 | Breast Cancer Survivors  (aromatase inhibitor therapy) | EX:63.2±7.1  CON:66.6±9.6 | EX:28.9±5.2  CON:31.5±6.3 | RCT | Combined  (Resistance & Aerobic) | 40 min resistance training consisting 1-3 sets of 8-20 repetitions at 55%-75% 1RM, followed by 30 min of aerobic training at 70–80% HRmax | 45 min of low-intensity stretching and relaxation exercises | 36 weeks | 3 | CRP |
| Dethlefsen et al, 2016 [42] | 32 | Breast Cancer Survivors | EX:46.0±9.6  CON:48.2±7.8 | EX:24.0±3.8  CON:24.8±3.7 | RCT | Combined  (Aerobic & Resistance) | 30 min HIIT at 80-90% Hrmax, combined with resistance training consisting of 3 sets of 8–10 repetitions at 70–90% 1RM | Received three health evaluation sessions with no structured exercise | 6  months | ≥3h/week | IL-6, IL-10  TNF-α  Leptin |
| Dieli-Conwright et al, 2018 [35] | 91 | Breast Cancer survivors | EX:52.8±10.1  CON:53.6±10.1 | EX:33.1±5.7  CON:33.4±5.2 | RCT | Combined  (Resistance & Aerobic) | 80 min of combined resistance and aerobic training on 2 non-consecutive days at 65-85% of HRmax, and 50 minutes of aerobic exercise on 1 day per week. | Maintained their usual physical activity | 16  weeks | 3 | IL-6, TNF-α  hs-CRP  Leptin  Adiponectin |
| Ergun et al, 2013 [37] | 60 | Breast Cancer | EX1:49.6±8.2  EX2:55.0±6.8  CON:50.3±10.4 | EX1:26.5±4.4  EX2:28.6±5.1  CON:28.6±5.1 | RCT | Combined  &  Aerobic | EX1: 45 min of combined resistance and aerobic training and 30 min brisk walking witheducation programme  EX2: 30 min brisk walkingwitheducation programme | Education programme only | 12  weeks | 3 | IL-6  TNF-α |
| Febvey-Combes, 2021 [36] | 58 | Localized Breast Cancer | EX:53.8±10.9  CON:48.9±11.1 | EX:25.2±5.8  CON:25.1±6.1 | RCT | Aerobic | 45-60 min of moderate-to-vigorous intensity aerobic exercises, including  Nordic walking (outdoors) and aerobic fitness (indoors), combined with nutritional counseling | Usual care with nutritional counseling | 6 months | 2-3 | IL6, TNF-α Adiponectin  Leptin |
| Gómez et al, 2011 [43] | 16 | Breast Cancer survivors | 50.0±5.0 | EX:24.0  CON:25.2 | RCT | Combined  (Resistance & Aerobic) | 90 min of combined resistance and aerobic training, including resistance training (1-3 sets of 8-15 repetitions) and aerobic training (20-30 min at 70-80% HRmax) on a cycle-ergometer | Followed their usual sedentary lifestyle | 8  weeks | 3 | IL-1β, IL1ra  IL6, IL10, TNF-α |
| Guinan et al, 2013 [29] | 26 | Breast Cancer Survivors | EX:50.0±8.3  CON:45.0±9.0 | ND | RCT | Aerobic | 21-42 min at 35-65% HRR | Usual care | 8 weeks | 3 | CRP |
| Hagstrom et al, 2016 [32] | 34 | Breast Cancer survivors | EX:51.2±8.5  CON:52.7±9.4 | EX:27.6±4.2  CON:29.9±6.4 | RCT | Resistance | 60 min, 3 sets of 8–10 repetitions at  80% 1RM | No exercise | 16  weeks | 3 | IL-6, IL-10  CRP, TNF-α |
| Hojan et al, 2020 [49] | 47 | Breast Cancer | EX:54.4±6.3  CON:54.6±5.3 | EX:24.4±2.8  CON:25.4±1.9 | RCT | Combined  (Aerobic & Resistance) | 45-50min aerobic training at 80% HRmax, combined with 40-45 min of resistance training consisting of 1-3 sets of 8-10 repetitions | Asked not to begin any formal training and to only perform their daily activities at home for no more than 150 min/ week | 9  weeks | 5 | IL-6  hsCRP |
| Hooshmand Moghadam et al, 2021 [38] | 40 | Breast Cancer Survivors | 57±1.0 | 28.2±2.2 | RCT | HIIT & Aerobic | HIIT: 4-7×30-second bouts at ≥90% HRmax with 2-min active recovery between intervals  MICT:20-30 min at 55-60% of peak power output (equivalent to 9-13 RPE) | Maintained their current lifestyle | 12  weeks | 3 | IL-6, IL-10  TNF-α Leptin  Adiponectin |
| Isanejad et al, 2023 [28] | 30 | Breast Cancer | EX144.0±9.1  EX2:46.3±6.3  CON:44.9± 5.0 | EX1:26.5±3.5  EX2:28.1±5.1  CON:27.4±4.9 | RCT | HIIT & Aerobic | HIIT: 33 min, 4×4 min 95% HRpeak followed by 3×3 min 75% HRpeak  MICT: 41 min at 65-75% HRpeak | No exercise | 12  weeks | 3 | IL-6, IL-10  TNF-α, Leptin  Adiponectin |
| Janelsins et al, 2011 [41] | 19 | Breast Cancer Survivors | EX:54.3±10.6  CON:52.7±6.7 | EX:24.9±5.8  CON:25.0±4.4 | RCT | Tai Chi Chuan | 40-min practice of a 15-move short form of Yang-style Tai Chi Chuan | Non-physical activity - 60-min psychosocial therapy | 12  weeks | 3 | IL-6 |
| Jones et al, 2013 [30] | 67 | Breast Cancer Survivors | EX:56.4±9.6  CON:55.4±7.6 | EX:30.6±6.0  CON:29.45±7.3 | RCT | Aerobic | 15-30 min at 50-80% HRmax | Usual care | 6 months | 3-5 | IL-6, CRP  TNF-α |
| Lee et al, 2022 [47] | 30 | Breast Cancer Survivors | EX:54.7±5.1  CON:55.4±4.3 | EX:24.2±3.9 CON:23.6±3.0 | RCT | Resistance | 50 min of high-intensity circuit resistance exercise (HCRE), 8 exercises included 3-4 sets of 8-16 repetitions at 40-80% 1RM with a 3-min rest period after each setS | Only performed activities of daily living during the study period. | 12  weeks | 2-3 | hsCRP |
| Ligibel et al, 2019 [46] | 46 | Breast Cancer | EX:52.3±9.6  CON:53.1±7.9 | EX:30.3±5.9 CON:31.4±6.8 | RCT | Combined  (Aerobic & Resistance) | 30-40 min of at least moderate-intensity aerobic exercise, followed by 20 min of strength training | Received a relaxation-based mind–body intervention, including the book and a relaxation | 4  weeks | 2 | IL6, CRP  Leptin  Adiponectin |
| Ligibel et al, 2009 [45] | 82 | Breast Cancer Survivors | EX:52.0±9.0  CON:53.0±9.0 | EX:30.7±6.1 CON:29.1±7.4 | RCT | Combined  (Aerobic & Resistance) | Target exercise goals included two supervised 50-min strength-training sessions per week and 90 min of  home-based aerobic exercise weekly | Received routine care | 16  weeks | 2 | Leptin  Adiponectin |
| Robbins et al, 2022 [48] | 32 | Breast Cancer Survivors | EX:61.6±7.0  CON:67.2±5.6 | EX:32.7±4.4  CON:28.9±4.7 | RCT | Resistance | 3 sets of 15-20 repetitions to exhaustion | Cognitively-Based Compassion Training | 12 weeks | 3 | CRP, Leptin  Adiponectin |
| Rogers et al, 2013 [34] | 20 | Breast Cancer | EX:58.0±6.1  CON:53.7±13.9 | EX:33.9±7.4  CON:30.3±7.1 | RCT | Combined  (Aerobic & Resistance) | 150 weekly minutes of ≥ moderate intensity exercise and two sessions per week on nonconsecutive days of resistance training (i.e., up to 20 repetitions of 8 different exercises using each of the major muscle groups) | Usual care | 3  months | 2 | IL-6, IL-10, TNF-α, Leptin  Adiponectin |
| Schmidt et al, 2016 [50] | 92 | Breast Cancer | EX:57.1±8.9  CON:57.3±8.8 | ND | RCT | Resistance | 3 sets of 8–12 repetitions at 60–80% 1RM | Relaxation | 12  weeks | 2 | IL-6  IL-1ra |
| Tizdast et al, 2016 [31] | 23 | Breast Cancer Survivors | 44.1±4.6 | EX1:29.9±2.8 EX2:30.0±3.4  CON:30.9±4.1 | RCT | Aerobic | MIIT: 5-8×3-5 min bouts at 40-60% THR with 1-2 min active recovery between intervals  MICT: 15-40 min at 30-50% THR | No exercise | 8  weeks | 3 | IL6, TNF-α hCRP |
| Winters-Stone et al, 2018 [39] | 215 | Breast Cancer Survivors | EX:59.8±11.4  CON:59.3±11.6 | EX:27.9±5.5  CON:28.5±5.3 | RCT | Resistance | 1-3 sets of 8-15 repetitions at 60-80% 1RM | whole body stretching and relaxation exercises in a seated or lying position | 12  weeks | 2 | IL-1β, IL-6  CRP, TNF-α, Leptin Adiponectin |
| Abbreviations: *Ex* exercise intervention; *CON* control; *F* female; *RCT* ­­randomized controlled study; *HIIT* high-intensity interval training; *MICT* moderate intensity continuous training; *VO2max/peak* maximal or peak oxygen uptake; *HRmax/peak* maximal or peak heart rate; *HRR*  heart rate reserve; *THR* target heart rate; *RT* resistance; *AT* aerobic; *1RM* one-repetition maximum; *BRPE* borg rating of perceived exertion; *ND* not-described; IL-1β interleukin-1 beta; *IL-8* interleukin-8; *IL-10* Interleukin-10; *TNF-α* tumor necrosis factor alpha | | | | | | | | | | | |
